# Supplementary material for: Impact of Pregnancy on the Levels of Parabens and Bisphenol A: Data from NHANES 2005–2010
Source: Hindawi journal article supplement (doi:10.1155/2016/1529071), 2016-01-01
Supplement: f1 [file 1529071.f1.pdf]

Supplementary material to

**Impact of Pregnancy on the Levels of Parabens and Bisphenol A : Data from NHANES 2005-2010**

**Ram B. Jain\***

**Private Consultant**

**Dacula, Georgia**

Table S1. Unadjusted geometric means with 95% confidence intervals in ng/ml for selected endocrine disrupting chemicals for Mexican Americans by country of birth. Data from National Health and Nutrition Examination Survey 2005-2010.

|                | Country of Birth        |                          | p-value |
|----------------|-------------------------|--------------------------|---------|
|                | USA                     | Mexico                   |         |
| Bisphenol A    | 2.54 (1.94 - 3.31)      | 1.84 (1.51 - 2.24)       | 0.048   |
| Butyl Paraben  | 1.73 (1.12 - 2.67)      | 0.86 (0.63 - 1.18)       | 0.018   |
| Ethyl Paraben  | 3.44 (2.62 - 4.53)      | 2.92 (2.14 - 3.98)       | 0.413   |
| Methyl Paraben | 245.07 (171.3 - 350.61) | 154.96 (120.75 - 198.87) | 0.044   |
| Propyl Paraben | 59.16 (38.29 - 91.42)   | 23.29 (17.12 - 31.66)    | 0.002   |
